1 **Global transcriptional analysis of *Geobacter sulfurreducens* under palladium reducing**  
2 **conditions reveals new key cytochromes involved**

3

4 Alberto Hernández-Eligio,<sup>a†</sup> Aurora M. Pat-Espadas,<sup>b,d†</sup> Leticia Vega-Alvarado,<sup>c</sup> Manuel  
5 Huerta-Amparán,<sup>a</sup> Francisco J. Cervantes,<sup>b,#</sup> Katy Juárez<sup>a\*</sup>

6

7 <sup>a</sup>Departamento de Ingeniería Celular y Biocatálisis, Instituto de Biotecnología, Universidad  
8 Nacional Autónoma de México, Cuernavaca, Morelos, Mexico.

9 <sup>b</sup>División de Ciencias Ambientales, Instituto Potosino de Investigación Científica y  
10 Tecnológica (IPICYT), San Luis Potosí, SLP, Mexico.

11 <sup>c</sup>Instituto de Ciencias Aplicadas y Tecnología, Universidad Nacional Autónoma de México,  
12 Ciudad Universitaria, Ciudad de México, Mexico.

13 <sup>d</sup>Instituto de Geología, Universidad Nacional Autónoma de México, Hermosillo, Sonora,  
14 Mexico

15 †CONACYT

16 #Address correspondence to Francisco J Cervantes: [fj cervantes@ipicyt.edu.mx](mailto:fj cervantes@ipicyt.edu.mx).

17 \*Address correspondence to Katy Juárez: [katy@ibt.unam.mx](mailto:katy@ibt.unam.mx).

18

19 Running Head: Pd(II) reduction mechanism in *Geobacter sulfurreducens*

20

21

22

23

## 24 **Abstract**

25 *Geobacter sulfurreducens* is capable of reducing Pd(II) to Pd(0) using acetate as electron  
26 donor; however, the biochemical and genetic mechanisms involved in this process have not  
27 been described. In this work, we carried out transcriptome profiling analysis to identify the  
28 genes involved in Pd(II) reduction in this bacterium. Our results showed that 252 genes  
29 were upregulated while 141 were downregulated during Pd(II) reduction. Among the  
30 upregulated genes, 12 were related to energy metabolism and electron transport; 50 were  
31 classified as involved in protein synthesis; 42 were associated with regulatory functions and  
32 transcription, and 47 have no homologs with known function. RT-qPCR data confirmed  
33 upregulation of genes encoding PilA, the structural protein for the electrically conductive  
34 pili, as well as *c*-type cytochromes GSU1062, GSU2513, GSU2808, GSU2934, GSU3107,  
35 OmcH, OmcM, PpcA, PpcD under Pd(II)-reducing conditions.  $\Delta pilA$  and  $\Delta pilR$  mutant  
36 strains showed 20% and 40% decrease in the Pd(II)-reducing capacity, respectively,  
37 compared to the wild type strain, indicating the central role of the pili in this process. RT-  
38 qPCR data collected during Pd(II) reduction also confirmed downregulation of the *omcB*,  
39 *omcC*, *omcZ*, and *omcS* genes, which have been shown to be involved in Fe(III) reduction  
40 and electrodes. Based on these results, we propose mechanisms involved in Pd(II) reduction  
41 by *G. sulfurreducens*.

42

## 43 **Importance**

44 *Geobacter sulfurreducens* is a versatile microorganism, known for its ability to reduce a  
45 wide range of environmentally relevant metals. It has been reported that this bacterium

46 synthesizes palladium nanoparticles successfully. Yet, the biochemical and genetic  
47 mechanisms involved in this process had not been described previously. By using a  
48 transcriptome profile analysis to identify genes implicated in this process and genetic and  
49 physiological data, we propose a model for the biological reduction of Pd(II) by *G.*  
50 *sulfurreducens*. Moreover, the study also revealed the microbial reduction of Pd(II) coupled  
51 to growth, which shows not only unexpected ideas about its complex metabolism, but some  
52 key cytochromes involved in this pathway, which have not been previously associated with  
53 other metal reducing process for this bacterium. In brief the present work contributes to a  
54 better understanding of the biochemical and genetic mechanisms involved in Pd(II)  
55 reduction and put forward novel insights about *G. sulfurreducens* metabolism.

## 56 **Introduction**

57 In the last two decades, the alternative of using bioreductive deposition of precious metals,  
58 such as the platinum-group (PGMs; e.g Pt, Pd, Rh), for their recovery has been widely  
59 explored. Special interest has been focused on palladium (Pd) due to its high value and  
60 extensive use as catalyst. Fe(III) reducing bacteria (IRB), such as *Shewanella oneidensis* (1)  
61 and *Geobacter sulfurreducens* (2), as well as sulfate reducing bacteria (SRB), such as  
62 *Desulfovibrio desulfuricans* (3), have extensively been explored for this purpose. Despite  
63 the great demand for developing efficient microbial processes to recover this valued  
64 element, the mechanisms involved in Pd(II) reduction and subsequent deposition of Pd(0)  
65 are poorly understood.

66 Extracellular formation of Pd(0) nanoparticles (NP's) has been reported in *G.*  
67 *sulfurreducens* (2). Moreover, differences regarding location of deposited NP's, depending  
68 on the strain, have been documented (3). These findings could be related to specific

69 mechanisms used by each strain, as well as to experimental conditions prevailing; however,  
70 further studies are required to fully elucidate the mechanisms involved.  
71 *Geobacter* species are abundant in nature and have the ability to perform extracellular  
72 electron transfer (EET) to reduce a broad array of heavy metals, such as Fe(III), Mn(IV),  
73 U(VI), Co(III) and Ag(I), among others (4, 5, 6, 7). Regarding Pd(II) reduction, using  
74 acetate as electron donor, *G. sulfurreducens* has been used to reduce up to 25 mg Pd(II)/L  
75 with the concomitant deposition of Pd(0) NP's (2). It has been proposed that the electron  
76 transfer reported for iron reduction could also be involved in Pd(II) reduction (8).  
77 Nevertheless, the genome of *G. sulfurreducens* has 111 predicted c-type cytochromes (9,  
78 10), hence it is likely that other cytochromes, as well as conductive pili, could play a role in  
79 Pd(II) reduction (11, 12). This is supported by the observation that some proteins or  
80 cytochromes are specifically required to achieve the reduction of certain metal species, as it  
81 has been reported for soluble Fe(III), Fe(III) oxides and U(VI) (9, 13, 14).  
82 The purpose of this study was to elucidate the mechanisms involved in Pd(II) reduction by  
83 *G. sulfurreducens*, based on global transcriptome analysis using RNA sequencing analysis.  
84 Quantitative reverse transcription PCR, genetic and physiological tests were also performed  
85 to identify genes involved in Pd(II) reduction. The Pd(II) reduction pathways in *G.*  
86 *sulfurreducens* were proposed based on the obtained results.

87

## 88 **Materials and Methods**

### 89 **Culture procedures**

90 Bacterial strains and oligonucleotides used in this study are listed in Table 1. *G.*

91 *sulfurreducens* PCA was grown anaerobically at 30 °C in NBAF medium, supplemented

92 with acetate and fumarate; these culture conditions were referred to as “Non-Pd(II)-  
93 reducing conditions” (15). For experiments conducted under “Pd(II)-reducing” conditions,  
94 late logarithmic phase cultures of *G. sulfurreducens* were used. The protocol consisted of  
95 harvesting cells by centrifugation at 9,000 *g* for 20 min and washing with a sterilized,  
96 osmotically balanced buffer. The reaction buffer composition was as follows (in grams per  
97 liter): NaHCO<sub>3</sub>, 2.5; NH<sub>4</sub>Cl, 0.25; NaH<sub>2</sub>PO<sub>4</sub>·H<sub>2</sub>O, 0.006; and KCl, 0.1. Reduction  
98 experiments were performed in 120-ml glass serum bottles capped with rubber stoppers  
99 including 100 ml of anaerobic basal medium, flushed with N<sub>2</sub>/CO<sub>2</sub> (80:20, v/v). Cell  
100 suspensions, as well as acetate and Na<sub>2</sub>PdC<sub>4</sub> (Sigma-Aldrich) stock solutions were added to  
101 yield a concentration of 800 mg l<sup>-1</sup> cell dry weight (CDW), 5 mM and 25 mg l<sup>-1</sup>,  
102 respectively (2, 8). RNA Later (Ambion) was added to cultures and cells for harvesting  
103 cells. Bacterial pellets were flash frozen and stored at -70 °C.

#### 104 **RNA extraction**

105 *G. sulfurreducens* cells from both “Pd(II) reduction” and “Non-Pd(II) reduction” conditions  
106 were used for RNA-Seq and RT-qPCR analyses. All experiments were performed in  
107 duplicates. For each biological sample, total RNA samples were extracted using the  
108 RNeasy mini kit (Qiagen), then they were examined with an Agilent 2100 Bioanalyzer and  
109 quantified using NanoDrop 200c (Thermo Scientific).

#### 110 **RNA-Seq and data analysis**

111 RNA-Seq was performed using RNA samples extracted from two independently grown  
112 cultures with and without Pd(II). Illumina sequencing was performed at the USMI (Unidad  
113 de Secuenciación Masiva, UNAM, Mexico). Briefly, after removing residual DNA using  
114 DNase I (ThermoScientific) and ribosomal RNA with Terminator 5'-Phosphate-dependent

115 exonuclease (Epicentre), the mRNA-enriched RNA was chemically fragmented to 150~200  
116 bp. Based on these cleaved RNA fragments, cDNA was synthesized using a random  
117 hexamer primer and reverse transcriptase. After end reparation and ligation of adaptors, the  
118 products were amplified by PCR, further purified, and used to create the final cDNA library.  
119 Libraries were sequenced on an Illumina Genome Analyzer IIX. Differential expression  
120 analyses were performed through IDEAmex website (<http://zazil.ibt.unam.mx/ideamex/>)  
121 using three methods: edgeR (16), DESeq (17) and NOISeq (18). edgeR and NOISeq were  
122 performed by applying TMM (19) as the normalization method. To identify differentially  
123 expressed genes, we selected those whose p value was <0.05 and fold change > 2, for each  
124 method. Finally, we considered as the best candidates, only genes that appeared  
125 differentially expressed in the three methods. The functional annotation of differentially  
126 expressed genes regarding the affected pathways was obtained from Kyoto Encyclopedia of  
127 Genes and Genomes (KEGG) (20), using our own R's scripts. RNA-Seq transcriptome data  
128 were deposited in the NCBI Gene Expression Omnibus database under accession number  
129 GSE113152.

### 130 **Quantitative real-time RT-PCR (RT-qPCR)**

131 To validate the quality of the sequencing data, some differentially expressed genes were  
132 selected for RT-qPCR analysis. mRNA was extracted as described in the section "RNA  
133 extraction" and DNA residual was removed using DNase I (Thermo Scientific). cDNA  
134 synthesis was performed using RevertAid H Minus First Strand cDNA Synthesis kit  
135 (Thermo Scientific). Subsequently, the RT-qPCR was performed using a Maxima SYBR  
136 Green/ROXq PCR Master Mix (Thermo Scientific) in a 96-well plate with the Light-Cycler  
137 II (Roche). Gene-specific primers used for RT-qPCR are shown in Table 1. *recC* was used

138 as gene internal standard for PCR amplification. Normalized fold changes of the relative  
139 expression ratio were quantified by the  $2^{-\Delta\Delta CT}$  method (21). All experiments were  
140 performed in triplicates and their average values were calculated.

### 141 **Cytochrome c content**

142 Membrane fractions of *G. sulfurreducens* were isolated as previously described (22, 23).  
143 Outer membrane-enriched fractions were prepared by treating crude membranes with a  
144 sarkosyl (sodium N-lauroyl sarcosinate solution at 1% wt/vol) to extract inner membrane  
145 proteins. Outer membrane proteins were analyzed by Tris-Glycine denaturing  
146 polyacrylamide gel electrophoresis, and *c*-type cytochromes were detected by staining with  
147 N,N,N,N-tetramethylbenzidine, as previously described (24, 25). PageRuler pre-stained  
148 protein standards were purchased from Thermo Scientific. The Tris-Glycine gel image was  
149 digitized using a Gel-doc (Bio Rad).

### 150 **Immunoblot analysis**

151 Protein extraction from cultures performed under “Pd(II)-reducing” and “Non-Pd(II)-  
152 reducing” conditions was conducted by western blot as follows: cells pellets were re-  
153 suspended in 150  $\mu$ l of B-PER II Bacterial Protein extraction reagent (Pierce) and incubated  
154 for 15 min. 1.0 mg of total protein per sample was incubated with PAGE-Buffer and boiled  
155 for 5 min and were separated on a 15% SDS-PAGE. After separation, proteins were  
156 transferred to nitrocellulose membranes (Merck-Millipore) for immunoblot analysis using  
157 rabbit polyclonal antibodies raised against *G. sulfurreducens* PilA. Blots were blocked with  
158 3% BSA in PBS overnight at 4°C and then incubated with a 1/1,000 dilution of primary  
159 antibody for 4 h at room temperature, washed with PBS, and incubated with a 1/5,000

160 dilution of goat anti-rabbit alkaline phosphatase-conjugated secondary antibody for 3 h at  
161 room temperature. After being washed, blots were developed with 5-bromo-4-chloro-3-  
162 indolylphosphatase (BCIP)-Nitro Blue Tetrazolium (Pierce) following the manufacturer's  
163 instructions.

#### 164 **Viability assay**

165 Cell viability assays after exposure to Pd(II) was performed by recovering the resting cells  
166 in NBAF medium and incubated to measure microbial growth. Prior to inoculation, cell  
167 suspensions under Pd(II)-reducing conditions were incubated for 3 h and further transferred  
168 from there to NBAF medium with a cellular density of 0.05 (OD 600<sub>nm</sub>). The cultures were  
169 incubated at 30 °C, and growth was periodically monitored as OD 600<sub>nm</sub>.

#### 170 **Microbial growth under Pd(II)-reducing conditions**

171 *G. sulfurreducens* was grown in bicarbonate-buffered medium (26), supplemented with 15  
172 mM pyruvate, 5 mg l<sup>-1</sup> of Na<sub>2</sub>PdCl<sub>4</sub> and 15 mM glutamine. Cultures were incubated at 30  
173 °C, and Pd(II) reduction, pyruvate consumption and growth were periodically monitored.  
174 All experimental treatments were set-up in triplicate.

#### 175 **Analytical techniques**

176 Reduction of Pd(II) was quantified as follows: 5 ml of Pd(II) medium, inoculated or non-  
177 inoculated, were filtered using 0.22 µm membrane filters (Millipore, Bedford, USA).

178 Filtrate samples were then analyzed by inductively coupled plasma-optic emission  
179 spectroscopy (ICP-OES, Varian 730-ES).

180 Pyruvate consumption was measured by a high performance liquid chromatography (HPLC,  
181 Agilent Technologies 1200 Series, Santa Clara, CA, USA) equipped with an Aminex HPX-



182 87H column (BIO-RAD). The column was maintained at 50 °C and was eluted with 5 mM  
183 H<sub>2</sub>SO<sub>4</sub> at a flow rate of 0.6 ml min<sup>-1</sup>. Pyruvate was detected by an UV detector at 210 nm.  
184 The standard reagent for quantification was purchased from Sigma-Aldrich (St Louis, MO,  
185 USA).

## 186 **X-ray diffraction analysis**

187 Analysis of the Pd(0) NP's deposited on the different strains of *G. sulfurreducens* was  
188 conducted in an X-Ray diffractometer Bruker D8 Advance. Samples were treated as  
189 previously described (2). X-ray diffraction (XRD) patterns were recorded from 20°-90° 2θ  
190 with a step time of 2 s and step size of 0.01° 2θ.

191

## 192 **Results and Discussion**

### 193 **Differentially expressed genes during Pd(II) reduction**

194 Previous studies have shown that *G. sulfurreducens* is able to reduce Pd(II) to Pd(0) NP's  
195 (2). However, the proteins involved in this respiratory process have not been identified. To  
196 examine the transcriptional changes that occur in *G. sulfurreducens* during Pd(II) reduction,  
197 we used RNA-Seq. The p-value and fold change were calculated by the statistical methods  
198 DESeq, edgeR and NOISeq. Only genes that showed differential expression by all methods  
199 were selected, resulting in 393 differentially expressed genes (Fig. 1A). A cut off p-value  
200 <0.05 and a fold change >2 was used.

201 Out of the 393 genes, 252 displayed statistically significant upregulation (>2 FC), and 141  
202 downregulation under Pd(II)-reducing conditions. This accounted for approximately 11%  
203 of the genes in the *G. sulfurreducens* genome, indicating that Pd(II) reduction triggered

204 significant global gene expression changes. The genes that showed significant differences  
205 in transcript levels were classified into the following functional categories: regulatory  
206 functions and transcription; energy metabolism and electron transport; DNA metabolism;  
207 transport; carbohydrate metabolism; proteolysis; protein synthesis; amino acids metabolism;  
208 mobile and extrachromosomal elements; metabolism of cofactors and vitamins; cell  
209 envelope; lipid metabolism; unknown function; and others (Fig. 1B).

210

211 The most differentially expressed genes were those involved in protein synthesis, where 50  
212 genes were upregulated, while 11 were downregulated. Among the genes upregulated,  
213 many are related to tRNA synthesis and ribosomal proteins, such as *rpsU-1*, *rpsB*, *rpsB*,  
214 *rpsT*, *rpmB*, *rplU* and *rpsL*. The second group corresponds to genes involved in regulatory  
215 functions and transcription with 55 genes (42 upregulated and 13 downregulated). The high  
216 number of upregulated transcriptional regulators points out the response of this bacterium  
217 to a non-common metal as electron acceptor. The third group of genes is involved in energy  
218 metabolism and electron transport (12 upregulated and 29 downregulated), of which 20  
219 code for *c*-type cytochromes.

220

### 221 **Expression of *c*-type cytochromes genes during Pd(II) reduction**

222 About half of the differentially expressed genes involved in energy metabolism and  
223 electron transport were related to *c*-type cytochromes (9 upregulated and 11  
224 downregulated); 8 are located in the outer membrane, 8 in the periplasmic, 1 in the  
225 cytoplasm, and 1 attached to the inner membrane, while the location of the remaining 2 is  
226 unknown (Table 2).

227

228 The most upregulated *c*-type cytochromes under Pd(II)-reducing conditions were GSU1062,  
229 GSU2808 and PpcA. GSU1062, a putative *c*-type cytochrome, is abundant under ferric  
230 citrate reducing conditions (27). Similarly, *gsu2808* encodes for an outer membrane  
231 cytochrome that it is reported overexpressed under Fe(III)-reducing conditions and its  
232 expression decreases in OmcB deficient conditions (28, 29). On the other hand, cytochrome  
233 PpcA participates in electron transfer in the periplasm. A *ppcA* mutant strain showed a  
234 decrease in Fe(III) and U(VI) reduction (30, 10). Additionally, the outer membrane  
235 cytochromes OmcH and OmcM were also overexpressed under Pd(II)-reducing conditions.  
236 Previous work has shown that *omcH* was overexpressed under growing conditions with  
237 insoluble Fe(III) oxides; while mutations in the *omcH* and *omcM* genes compromise the  
238 reduction of Fe(III) oxides (31). Overexpression of these cytochromes under Pd(II)-  
239 reducing conditions suggests that they could be involved in the extracellular reduction of  
240 Pd(II).

241 Other *c*-type cytochromes upregulated during Pd(II) reduction were PpcD, GSU2513,  
242 GSU2934 and GSU3107. PpcD is overexpressed during the reduction of Mn(IV) oxides,  
243 while the *gsu2934* gene is overexpressed during reduction of Fe(III) oxides (31). The  
244 putative cytochrome GSU2513 has not previously been reported and its function has yet to  
245 be elucidated.

246

247 Surprisingly, during Pd(II) reduction, cytochromes OmcB, OmcC, OmcS and OmcZ, which  
248 are involved in the reduction of Fe(III), Mn(IV), and U(VI) (31) were downregulated. A  
249 previous model of microbial reduction of Pd(II) by *G. sulfurreducens* suggested that  
250 cytochromes OmcB and OmcS, important in the reduction of Fe(III), Mn(IV) or U(VI),

251 could be involved in the reduction process (8); however, our data suggest that the Pd(II)  
252 reduction pathway does not involve those common cytochromes, but others with different  
253 biochemical characteristics.

254

## 255 **Transcriptional regulation genes expressed in Palladium reduction**

256 The expression profile of some genes encoding proteins involved in transcriptional  
257 regulation was considerably altered under Pd(II)-reducing conditions (Table 3). The *gnfK*,  
258 *gnfR* and *glnB* genes were upregulated. It has previously been reported that *gnfK*, *gnrR* and  
259 *glnB* are upregulated during nitrogen fixation in *G. sulfurreducens* (32). *gnfK* and *gnfR*  
260 encode for a un orthodox two-component system, being GnfK a Histidine Kinase and GnrR  
261 a Response Regulator. Phosphorylated GnfR, instead of acting as a transcriptional regulator,  
262 as the majority of the Response Regulators, binds to the *nifH* mRNA, preventing the  
263 formation of a stem-loop structure and therefore avoiding transcription termination (32). In  
264 *Geobacter* species, overexpression of genes related to nitrogen fixation has been detected in  
265 sediments contaminated with crude oil, groundwater contaminated with uranium, and in  
266 microbial fuel cells (33, 34). Under such conditions, where nutrient limitation may exist, it  
267 has been proposed that nitrogen fixation is critical for cell growth. Similarly, nitrogen  
268 fixation may be an important process during Pd(II) reduction.

269 Unexpectedly, HgtR was upregulated more than 5.5 times under Pd(II)-reducing conditions.  
270 HgtR has been reported as a global regulator for genes involved in biosynthesis and energy  
271 generation in *Geobacter* species. Its expression was essential for growth with hydrogen,  
272 during which hgtR expression was induced (35). Moreover, it represses the transcription of  
273 several genes of the central metabolism and energy generation, such as *gltA* (citrate

274 synthase), *nouA* (NADH dehydrogenase I subunit), *atpG* (ATP synthase FoB'), *srfB*  
275 Reductase B' subunit), *icd* (isocitrate dehydrogenase) and *gntR* (35).  
276 We observed a decrease in the expression of *gltA*, *icd-mdh*, *atpG* and *nuo* genes, likely by  
277 the upregulation of *hgtR* under Pd(II)-reducing conditions. The increase in *hgtR* expression  
278 in our experiments was presumably due to the presence of Pd(II), and not to hydrogen,  
279 because we used strict anaerobic conditions under a N<sub>2</sub>/CO<sub>2</sub> (80/20%) atmosphere without  
280 H<sub>2</sub>. In addition, *nuoH-1*, *nouD*, *nuoL-1* and *nuoF-1*, which form part of an operon of 14  
281 genes that encode for the NADH dehydrogenase, were also downregulated (see Table S1).  
282  
283 The transcriptional regulator Fur was also upregulated during Pd(II) reduction. Fur activity  
284 is controlled by intracellular levels of Fe(II) and directly regulates the expression of the  
285 *feoAB*, *gsu2432*, *gsu2937*, *gsu3274*, *ideR* and *gsu1639* genes (36). However, the regulon  
286 Fur also represses genes, such as citrate synthase (*gltA*), isocitrate dehydrogenase (*icd*), 2-  
287 oxoglutarate oxidoreductase (*gsu1467*, *gsu1468*, *gsu1469* and *gsu1470*), malate  
288 dehydrogenase (*mdh*), NADH (*gsu0346*, *gsu0347*, *gsu0348*, *gsu0349*, *gsu0350*, *gsu0351*)  
289 and OmcZ (*gsu2076*) (36). Fur upregulation during Pd(II) reduction may be the result of  
290 iron limiting condition, so that cells would have been trying to overexpress genes related to  
291 homeostasis and iron uptake. With these results, we can observe that during Pd(II)  
292 reduction, *gltA*, *icd*, *mdh*, *gsu1466*, *gsu1468*, *gsu0349* and *omcZ* were downregulated and  
293 could be the result of Fur and HgtR overexpression.  
294  
295 Among the genes coding for possible transcriptional regulators that are upregulated during  
296 Pd(II) reduction are *gsu1072*, *gsu0922*, *gsu1639*, *gsu2980*, *gsu3206*, *gsu2185* whose  
297 function has not yet been elucidated. Overall, other genes coding for Histidine Kinases and

298 Response Regulators, as well as transcriptional activators and repressors associated with  
299 Pd(II) reduction, were differentially expressed.

300

### 301 **Cytochrome *c* and PilA proteins content during palladium reduction**

302 In order to evaluate if mRNA expression correlates with protein content for some *c*-type  
303 cytochromes differentially expressed under Pd(II)-reducing conditions, we examined their  
304 level by heme-staining of protein gels. As shown in Figure 2A, preparations of soluble  
305 fraction, inner membrane and outer membrane proteins, revealed differences in abundance  
306 of *c*-type cytochromes in acetate-Pd(II) vs acetate-fumarate conditions. Those bands  
307 corresponded to the OmcB and OmcC outer membrane multiheme *c*-type cytochromes,  
308 required for Fe(III) reduction in *G. sulfurreducens* (29, 37). OmcS, which is required for  
309 Fe(III) oxide reduction (38) and the outer membrane multiheme *c*-type cytochrome, OmcZ,  
310 required for optimal current production in microbial fuel cells (39), were abundant in  
311 acetate-fumarate in contrast to acetate-Pd(II) conditions.

312

313 We also examined the expression of *pilA* gene (GSU1496), which was upregulated under  
314 Pd(II)-reducing conditions. To verify the PilA protein content under these conditions,  
315 Immunoblotting analysis was performed using anti-PilA antibodies. As shown in Figure 2B,  
316 PilA was overproduced under these conditions. These results were surprising since the pili  
317 is reported to be required for extracellular electron transfer to insoluble electron acceptors,  
318 such as metal oxides and electrodes (12), but not to soluble metals.

319

### 320 **Contribution of pili on Pd(II) reduction**

321 In *G. sulfurreducens*, the pili is an important structure participating in long-distance  
322 extracellular electron transfer to Fe(III) oxides, electron exchange between syntrophic  
323 partners, as well as electrodes to generate bioelectricity (12, 40, 41). In order to evaluate the  
324 contribution of pili to the reduction of Pd(II) to Pd(0), we studied this process in several  
325 mutants that have a direct effect on PilA synthesis. Strain  $\Delta pilR$  does not produce the PilR,  
326 which is the major transcriptional activator of the *pilA* gene, which codes for pilin, the  
327 structural protein of pili (12); therefore, in this mutant, PilA is severely diminished (23).  
328 Thus, Pd(II) reduction in  $\Delta pilA$  and  $\Delta pilR$  mutant strains was quantified. We observed that  
329 98% of Pd(II) is reduced to Pd(0) in the WT strain within the first hour of incubation, while  
330 in the  $\Delta pilA$  strain, 81% of Pd(II) was reduced during the same incubation period. When we  
331 tested the  $\Delta pilR$  strain, only 61% of Pd(II) reduction was reached after three hours (Fig.  
332 3A). Pd(II) reduction was concomitant with an evident change in color of the biomass,  
333 which turned black (Fig. 3A inset). To analyze the nature of the palladium NP's produced,  
334 samples of cells covered with these metal were analyzed by XRD (Fig. 3B). The results  
335 confirmed the formation of Pd(0) NP's. The pattern of XRD in all samples showed five  
336 strong Bragg reflections at  $2 < \theta >$  values around 40.11, 46.66, 68.13, 82.11, which  
337 correspond to planes (111), (200), (220), and (311) of a face-centered cubic lattice (fcc)  
338 (XRD pattern was indexed to ICDD card 89-4897 (fcc palladium syn)). XRD pattern  
339 showed that the Pd NPs were crystalline in nature.  
340

341 It has been observed that under U(VI)-reducing conditions, using a  $\Delta pilA$  mutant, the  
342 production of some *c*-type cytochrome is diminished, which results in a slight decrease in  
343 the reduction of U(VI) to U(IV) (42). It has been suggested that the slight reduction of  
344 U(VI) in the pili-deficient strain is due to the decrease in outer membrane *c*-type  
345 cytochromes and not to pili deficiency (43). Therefore, the slight negative effect on the  
346 reduction of Pd(II) by the  $\Delta pilA$  strain, in our experiments, could be due to a decrease in the  
347 production of outer membrane *c*-type cytochromes, rather than a negative effect on the pili  
348 itself, similarly to reports on U(VI) reduction (43). Since PilR is a transcriptional regulator  
349 that controls the expression of at least 44 genes, among which are several *c*-type  
350 cytochromes, we propose that the decreased in Pd(II) reduction observed in the  $\Delta pilR$   
351 mutant strain could be related to *c*-type cytochrome content rather than to pili absence.  
352 Pd(II) is a toxic metal for many microorganisms; it may inhibit the activity of creatine  
353 kinase, aldolase, succinate dehydrogenase, carbonic anhydrase, alkaline phosphatase and  
354 prolyl hydroxylase (44). Pd(II) has been found to be toxic in *Shewanella oneidensis*;  
355 however, exposed cells could be recovered when a suitable electron donor was provided (1).  
356 Similar to *S. oneidensis*, *G. sulfurreducens* could recover viability after the reduction of  
357 Pd(II) in NBAF medium, as shown in supplementary data (Fig. S1). In addition, the  $\Delta pilA$   
358 and  $\Delta pilR$  mutant strains took slightly more time than the WT strain to recover viability  
359 after exposure to Pd(II) (Fig. S1), which may be due to increased exposure to Pd(II),  
360 resulting from the decreased capacity of these strains to reduce this metal (Fig. 3A).  
361



## 362 **Growth of *Geobacter sulfurreducens* coupled to Pd(II) reduction**

363 Because the biological reduction of Pd(II) by *S. oneidensis*, *D. desulfuricans* and *G.*  
364 *sulfurreducens* was carried out with resting cells, it is unknown whether this process can be  
365 coupled to microbial growth (3, 1, 2). In order to evaluate if *G. sulfurreducens* can couple  
366 growth to Pd(II) reduction, incubations were performed in FW medium (see experimental  
367 procedures) using acetate (20 mM), lactate (15 mM) or pyruvate (15 mM) as electron  
368 donors, and Pd(II) (5 mg/mL) as electron acceptor. No microbial growth was observed with  
369 acetate and lactate, which may be due to the fact that the RNA-Seq results showed that the  
370 *gltA* (citrate synthase) and *mdh* (malate dehydrogenase) genes were downregulated during  
371 Pd(II) reduction, possibly exerting a negative effect on the TCA cycle and therefore on the  
372 production of energy. However, by providing pyruvate as an electron donor, we would  
373 expect that *G. sulfurreducens* could use an alternative pathway to that of acetate  
374 metabolism, redirecting it to biomass biosynthesis (45). However, under these conditions,  
375 neither growth nor Pd(II) reduction was observed (data not shown). To verify if the lack of  
376 microbial growth observed, could be due to a limitation in the nitrogen source, because it is  
377 worth noting that, under Pd(II)-reducing conditions, we observed the overexpression of  
378 genes related to nitrogen fixation (*gnfK*, *gnfR* and *glnB*), glutamine was also added to the  
379 culture medium. Interestingly, under these conditions, we observed microbial growth in  
380 pyruvate-Pd(II) medium (Fig. 4A). Moreover, this growth was coupled to the reduction of  
381 90% Pd(II) to Pd(0) (Fig. 4B) and to the consumption of up to 3 mM of pyruvate (Fig. 4C).  
382 Our results imply complex linkages between central metabolism and Pd(II) reduction in *G.*  
383 *sulfurreducens*. Future research is necessary to identify which nutritional elements are  
384 conditioning factors to favor the bacterial growth in the presence of other rare metals.

385 However, to our knowledge, this paper reports, for the first time, the microbial reduction of  
386 Pd(II) coupled to growth.

### 387 **Validation of selected differentially expressed genes using RT-qPCR**

388 To verify results obtained from RNA-Seq experiments and to get quantitative data to  
389 compare the transcript abundances under Pd(II)-reducing conditions, we performed RT-  
390 qPCR analyses from 24 selected genes encoding proteins involved in electron transfer,  
391 transcriptional regulators and central metabolism (Table 4). These genes included the *c*-  
392 type cytochromes genes (*omcH*, *omcM*, *omcB*, *omcC*, *omcS*, *omcZ*, *ppcD*, *gsu1062*, *ppcB*,  
393 *omcE*, *ccpA*, *gsu0615*, *gsu2937*, *gsu2513*, *gsu2808*, *omcQ* and *gsu2495*) and the cold shock  
394 DNA/RNA-binding protein, *gsu0207*, the transcriptional regulators, *hgtR* and *gsu0837*, the  
395 menaquinol oxidoreductase complex Cbc3, *gsu1650*, the pilin protein, *pilA*, the NADH  
396 dehydrogenase I, *nuoH-1*, and the citrate synthase I, *gltA*.

397

398 Upregulation of *omcH*, *omcM*, *gsu1062*, *gsu2513*, *gsu2808* and *ppcD* genes that encoded  
399 for *c*-type cytochromes under Pd(II)-reducing conditions was confirmed by RT-qPCR.  
400 Similarly, the expression of *pilA*, *gsu0207*, *hgtR* y *gsu1650* was high under these conditions  
401 according to the RT-qPCR. On the other hand, the low transcription of *omcB*, *omcC*, *omcS*,  
402 *omcZ*, *gsu0837*, *gsu0345*, *gsu2813*, *gsu0615*, *gsu2937*, *omcQ*, *gsu2495* and *gsu1106*  
403 observed in RNA-Seq analyses was confirmed by RT-qPCR. Furthermore, the low  
404 transcription of *nuoH-1* and *gltA* genes was also observed, in agreement with the high  
405 expression of *hgtR*, a negative regulator for these genes (35).

406

### 407 **Model for biological Pd(II) reduction by *Geobacter sulfurreducens***

408 Biological reduction of Pd(II) is a poorly studied process. To date, several bacteria have  
409 been reported with the ability to reduce Pd(II) to Pd(0) NP's (46). In *Desulfovibrio*  
410 *fructosivorans* and *Escherichia coli*, the biological reduction of Pd(II) to Pd(0) is linked to  
411 the activity of a hydrogenase (47, 48). *Shewanella oneidensis* and *D. desulfuricans* present  
412 a similar Pd(II) reduction mechanism, suggesting that hydrogenase and cytochrome c3 are  
413 involved in the reduction process (3, 46).

414 Based on the results shown here, we propose the following Pd(II) reduction model:

415 Electrons derived from the anaerobic metabolism are transferred through the electron  
416 carriers NADH dehydrogenase and MQ to the periplasmic cytochrome MacA, which  
417 transfers the electrons to the tri-heme-periplasmic cytochromes PpcA/PpcD. PpcA/PpcD  
418 then transport the electrons to the outer membrane cytochromes GSU2513, GSU2808,  
419 OmcM and OmcH, which ultimately reduce Pd(II) to Pd(0) (Fig. 5). In addition, the  
420 periplasmic cytochromes GSU1062 and CbcN could be intermediates in electron transfer  
421 from MacA and/or PpcA/PpcD to the outer membrane cytochromes. Future analyses are  
422 necessary to elucidate whether Pd(II) reduction proceeds in the periplasm.

423

## 424 **Acknowledgments**

425 We thank Raunel Tinoco, Ramiro Baeza Jimenez, Ricardo Grande and Veronica Jiménez  
426 for their technical support. This study was financially supported by CONACYT (Program  
427 Frontiers in Science, Grant 1289 and Program Basic Science, Grant 255476). We thank  
428 Enrique Morett for critically reading the manuscript. Finally, we greatly acknowledge the  
429 support from the national laboratories USMB, LANBAMA and LINAN for their  
430 contribution in sample analyses.

431

432 **References**

433 1. De Windt W, Boon N, Van den Bulcke J, Rubberecht L, Prata F, Mast J, Hennebel T,  
434 Verstraete W. 2006. Biological control of the size and reactivity of catalytic Pd(0) produced  
435 by *Shewanella oneidensis*. *Antonie van Leeuwenhoek* 90:377-389.

436

437 2. Pat-Espadas AM, Razo-Flores E, Rangel-Mendez JR, Cervantes FJ. 2013. Reduction of  
438 palladium and production of nano-catalyst by *Geobacter sulfurreducens*. *Appl Microbiol*  
439 *Biotech* 97:9553–9560.

440

441 3. Lloyd JR, Yong P, Macaskie LE. 1998. Enzymatic recovery of elemental palladium by  
442 using sulfate-reducing bacteria. *Appl Environ Microbiol* 64(11):4607–4609.

443

444 4. Caccavo F, Lonergan DJ, Lovley DR, Davis M, Stolz JF, McInerney MJ. 1994.  
445 *Geobacter sulfurreducens* sp. nov., a hydrogen- and acetate-oxidizing dissimilatory metal-  
446 reducing microorganism. *Appl Environ Microbiol* 60:3752–3759.

447

448 5. Sanford RA, Wu Q, Sung Y, Thomas SH, Amos BK, Prince EK, Löffler FE. 2007.  
449 Hexavalent uranium supports growth of *Anaeromyxobacter dehalogenans* and *Geobacter*  
450 spp. with lower than predicted biomass yields. *Environ Microbiol* 9(11):2885–2893.

451

- 452 6. Law N, Ansari S, Livens FR, Renshaw JC, Lloyd JR. 2008. Formation of nanoscale  
453 elemental silver particles via enzymatic reduction by *Geobacter sulfurreducens*. *Appl*  
454 *Environ Microbiol* 74(22):7090–7093.
- 455
- 456 7. Lovley DR, Ueki T, Zhang T, Malvankar NS, Shrestha PM, Flanagan KA, Aklujkar M,  
457 Butler JE, Giloteaux L, Rotaru AE, Holmes DE, Franks AE, Orellana R, Risso C, Nevin K  
458 P. 2011. *Geobacter*: the microbe electric's physiology, ecology, and practical applications.  
459 *Adv Microb Physiol* 59:1-100.
- 460
- 461 8. Pat-Espadas AM, Razo-Flores E, Rangel-Mendez JR, Cervantes FJ. 2014. Direct and  
462 Quinone-Mediated Palladium Reduction by *Geobacter sulfurreducens*: Mechanisms and  
463 Modeling. *Environ Sci Technol* 48(5):2910–2919.
- 464
- 465 9. Ding YH, Hixson KK, Aklujkar MA, Lipton MS, Smith RD, Lovley DR, Mester T. 2008.  
466 Proteome of *Geobacter sulfurreducens* grown with Fe(III) oxide or Fe(III) citrate as the  
467 electron acceptor. *Biochim Biophys Acta* 1784(12): 1935–1941.
- 468
- 469 10. Mehta T, Coppi MV, Childers SE, Lovley DR. 2005. Outer membrane *c*-type  
470 cytochromes required for Fe(III) and Mn(IV) oxide reduction in *Geobacter sulfurreducens*.  
471 *Appl Environ Microbiol* 71(12):8634–8641.
- 472
- 473 11. Childers SE, Ciufo S, Lovley DR. 2002. *Geobacter metallireducens* accesses insoluble  
474 Fe(III) oxide by chemotaxis. *Nature* 416 (6882):767–769.

- 475 12. Reguera G, McCarthy KD, Mehta T, Nicoll JS, Tuominen MT, Lovley DR. 2005.  
476 Extracellular electron transfer via microbial nanowires. *Nature* 435:1098-1101.  
477
- 478 13. Shelobolina ES, Coppi MV, Korenevsky AA, DiDonato LN, Sullivan SA, Konishi H,  
479 Xu H, Leang C, Butler JE, Kim BC, Lovley DR. 2007. Importance of *c*-type cytochromes  
480 for U(VI) reduction by *Geobacter sulfurreducens*. *BMC Microbiol* 7:16.  
481
- 482 14. Shi L, Squier TC, Zachara JM, Fredrickson JK. 2007. Respiration of metal (hydr)oxides  
483 by *Shewanella* and *Geobacter* : a key role for multihaem *c* -type cytochromes. *Mol*  
484 *Microbiol* 65(1):12–20.  
485
- 486 15. Coppi MV, Leang C, Sandler SJ, Lovley DR. 2001. Development of a genetic system  
487 for *Geobacter sulfurreducens*. *Appl Environ Microbiol* 67(7):3180-3187.  
488
- 489 16. Robinson MD, McCarthy DJ, Smyth GK. 2010. EDGER: a Bioconductor package for  
490 differential expression analysis of digital gene expression data. *Bioinformatics* 26:139-140.  
491
- 492 17. Anders S, Huber W. 2010. Differential expression analysis for sequence count data.  
493 *Genome Biol* 11(10):R106.  
494
- 495 18. Tarzona S, García-Alcalde F, Dopazo J, Ferrer A, Conesa A. 2011. Differential  
496 expression in RNA-Seq: a matter of depth. *Genome Res* 21(12): 2213-2223.  
497

- 498 19. Robinson MD, Oshlack A. 2010. A scaling normalization method for differential  
499 expression analysis of RNA-Seq data. *Genome Biol* 11(3): R25.  
500
- 501 20. Kanehisa M, Goto S. 2000. KEGG: Kyoto Encyclopedia of genes and genomes.  
502 *Nucleic Acids Res* 28(1):27-30.  
503
- 504 21. Livak K, Shmittgen TD. 2001. Analysis of relative gene expression data using real-time  
505 quantitative PCR and the 2-(Delta Delta C(T)) method. *Methods* 25:402–408.  
506
- 507 22. Kim BC, Leang C, Ding YH, Glaven RH, Coppi MV, Lovley DR. 2005. OmcF, a  
508 putative *c*-type monoheme outer membrane cytochrome required for the expression of other  
509 outer membrane cytochromes in *Geobacter sulfurreducens*. *J Bacteriol* 187(13):4505-4513.  
510
- 511 23. Juárez K, Kim BC, Nevin K, Olvera L, Reguera G, Lovley DR, Methé BA. 2009. PilR,  
512 a transcriptional regulator for pilin and other genes required for Fe(III) reduction in  
513 *Geobacter sulfurreducens*. *J Mol Microbiol Biotechnol* 16:146-158.  
514
- 515 24. Thomas PE, Ryan D, Levin W. 1976. An improved staining procedures for the  
516 detection of the peroxidase activity of cytochrome P-450 on sodium dodecyl sulfate  
517 polyacrylamide gels. *Anal Biochem* 75:168-176.  
518
- 519 25. Francis RT Jr, Becker RR. 1984. Specific indication of hemoproteins in polyacrylamide  
520 gel using a double-staining process. *Anal Biochem* 136(2):509-514.

- 521 26. Lovley DR, Giovannoni SJ, White DC, Champine JE, Phillips EJP, Gorby YA,  
522 Goodwin S. 1993. *Geobacter metallireducens* gen. nov. sp. nov., a microorganism capable  
523 of coupling the complete oxidation of organic compounds to the reduction of iron and other  
524 metals. *Arch Microbiol* 159(4):336–344.
- 525
- 526 27. Ding YH, Hixson KK, Giometti CS, Stanley A, Esteve-Nuñez A, Khare T, Tollaksen  
527 SL, Zhu W, Adkins JN, Lipton MS, Smith RD, Mester T, Lovley DR. 2006. The proteome  
528 of dissimilatory metal-reducing microorganism *Geobacter sulfurreducens* under various  
529 growth conditions. *Biochim Biophys Acta* 1764(7):1198-1206.
- 530
- 531 28. Methé BA, Webster J, Nevin K, Butler J, Lovley DR. 2005. DNA Microarray analysis  
532 of nitrogen fixation and Fe(III) reduction in *Geobacter sulfurreducens*. *App Environ*  
533 *Microbiol* 71(5): 2530-2538.
- 534
- 535 29. Leang C, Adams LA, Chin KJ, Nevin KP, Methé BA, Webster J, Sharma ML, Lovley  
536 DR. 2005. Adaptation to disruption of the electron transfer pathway for Fe(III) reduction in  
537 *Geobacter sulfurreducens*. *J Bacteriol* 187(17):5918-5926.
- 538
- 539 30. Lloyd JR, Leang C, Hodges MAL, Coppi MV, Cuifo S, Methé B, Sandler SJ, Lovley  
540 DR. 2003. Biochemical and genetic characterization of PpcA, a periplasmic *c*-type  
541 cytochrome in *Geobacter sulfurreducens*. *Biochem J* 369(1):153-161.
- 542
- 543 31. Aklujkar M, Coppi MV, Leang C, Kim BC, Chavan MA, Perpetua LA, Giloteaux L,  
544 Liu A, Holmes DE. 2013. Proteins involved in electron transfer to Fe(III) and Mn(IV)



- 545 oxides by *Geobacter sulfurreducens* and *Geobacter uraniireducens*. *Microbiol* 159:515-  
546 535.
- 547
- 548 32. Ueki T, Lovley DR. 2010. Novel regulatory cascades controlling expression of  
549 nitrogen-fixation genes in *Geobacter sulfurreducens*. *Nucleic Acids Res* 38(21):7485-7499.  
550
- 551 33. Holmes DE, Nevin KP, Lovley DR. 2004. In situ expression of *nifD* in Geobacteraceae  
552 in subsurface sediments. *Appl Environ Microbiol* 70:7251-7259.  
553
- 554 34. Holmes DE, O'Neil RA, Chavan MA, N'Guessan LA, Vrionis HA, Perpetua LA,  
555 Larrahondo MJ, DiDonato R, Liu A, Lovley DR. 2009. Transcriptome of *Geobacter*  
556 *uraniireducens* growing in uranium-contaminated subsurface sediments. *ISME J* 3:216-230.  
557
- 558 35. Ueki T, Lovley DR. 2010. Genome-wide gene regulation of biosynthesis and energy  
559 generation by a novel transcriptional repressor in *Geobacter* species. *Nucleic Acids Res*  
560 38(3):810-821.  
561
- 562 36. Embree M, Qiu Y, Shieu W, Nagajaran H, O'Neil R, Lovley DR, Zengler K. 2014. The  
563 iron stimulon and Fur regulon of *Geobacter sulfurreducens* and their role in energy  
564 metabolism. *App Environ Microbiol* 80(9):2918-2927.  
565
- 566 37. Liu Y, Fredrickson JK, Zachara JM, Shi L. 2015. Direct involvement of ombB, omaB,  
567 and omcB genes in extracellular reduction of Fe(III) by *Geobacter sulfurreducens* PCA.  
568 *Front Microbiol* 6:1075.

569

570 38. Qian X, Mester T, Morgado L, Arakawa T, Sharma ML, Inoue K, Joseph C, Salgueiro  
571 CA, Maroney MJ, Lovley DR. 2011. Biochemical characterization of purified OmcS, a *c*-  
572 type cytochrome required for insoluble Fe(III) reduction in *Geobacter sulfurreducens*.  
573 *Biochim Biophys Acta* 1807(4):404-412.

574

575 39. Inoue K, Leang C, Franks AE, Woodard TL, Nevin KP, Lovley DR. 2011. Specific  
576 localization of the *c*-type cytochrome OmcZ at the anode surface in current-producing  
577 biofilms of *Geobacter sulfurreducens*. *Environ Microbiol Rep* 3(2):211-217.

578

579 40. Smith JA, Lovley DR, Tremblay PL. 2013. Outer cell surface components essential for  
580 Fe(III) oxide reduction by *Geobacter metallireducens*. *Appl Environ Microbiol* 79:901–907.

581

582 41. Summers ZM, Fogarty HE, Leang C, Franks AE, Malvankar NS, Lovley DR. 2010.  
583 Direct exchange of electrons within aggregates of an evolved syntrophic coculture of  
584 anaerobic bacteria. *Science* 330:1413–1415.

585

586 42. Cologgi DL, Lampa-Pastirk S, Speers AM, Kelly SD, Reguera G. 2011. Extracellular  
587 reduction of uranium via *Geobacter* conductive pili as a protective cellular mechanism.  
588 *Proc Natl Acad Sci* 108(37):15248 –15252.

589

590 43. Orellana R, Leavitt J, Comolli LR, Csencsits R, Janot N, Flanagan KA, Gray AS, Leang  
591 C, Izallalen M, Mester T, Lovley DR. 2013. U(VI) Reduction by diverse outer surface *c*-  
592 type cytochromes of *Geobacter sulfurreducens*. *Appl Environ Microbiol* 79:6369–6374.

593

594 44. Liu TZ, Lee SD, Bhatnagar RS. 1979. Toxicity of palladium. *Toxicol Lett* 4(6):469–473.

595

596 45. Wilkins MJ, Wrighton KC, Nicora CD, Williams KH, McCue LA, Handley KM, Miller

597 C S, Giloteaux L, Montgomery AP, Lovley DR, Banfield JF, Long PE, Lipton MS. 2013.

598 Fluctuations in species-level protein expression occur during element and nutrient cycling

599 in the subsurface. *PLoS One* 8(3): e57819

600

601 46. De Corte S, Hennebel T, De Gussem B, Verstraete W, Boon N. 2012. Bio-palladium:

602 from metal recovery to catalytic applications. *Microb Biotechnol* 5(1):5-17.

603

604 47. Mikheenko IP, Rousset M, Dementin S, Macaskie LE. 2008. Bioaccumulation of

605 palladium by *Desulfovibrio fructosivorans* wild-type and hydrogenase-deficient strains.

606 *Appl Environ Microbiol* 74: 6144–6146.

607

608 48. Deplanche K, Caldelari I, Mikheenko IP, Sargent F, Macaskie LE. 2010. Involvement

609 of hydrogenases in the formation of highly catalytic Pd(0) nanoparticles by bioreduction of

610 Pd(II) using *Escherichia coli* mutant strains. *Microbiol* 156(9):2630-2640.

611

612 49. Gardy JL, Spencer C, Wang K, Ester M, Tusnády GE, Simon I, Hua S, deFays K,

613 Lambert C, Nakai K, Brinkman FS. 2003. PSORT-B: Improving protein subcellular

614 localization prediction for Gram-negative bacteria. *Nucleic Acids Res* 31(13):3613-3617.

615

616 50. Emanuelsson O, Brunak S, von Heijne G, Nielsen H. 2007. Locating proteins in the cell  
617 using TargetP, SignalP, and related tools. *Nat Protoc* 2(4):953-971.

618

619

### Figure Legends

620 **FIG 1.** Transcriptome analysis results from *Geobacter sulfurreducens* under Pd(II)-  
621 reducing conditions. (A) Venn diagram representing differential gene expression analysis  
622 from Pd(II)-reducing conditions by three statistical methods. (B) Functional overview of  
623 the genes that were differentially expressed during Palladium reduction.

624

625 **FIG 2.** *c*-type cytochrome and PilA protein content found under Pd(II)-reducing conditions.  
626 (A) SDS-PAGE heme stained. Outer membrane (OM), inner membrane (IM) and soluble  
627 fraction (SF) were prepared from PCA strain with acetate-fumarate (Ac-F) or acetate-Pd(II)  
628 (Ac-Pd(II)). The localization of OmcC, OmcB, OmcS, OmcZ and PpcA were labeled based  
629 on expected molecular weight (78.96, 74.89, 42.94, 47.09 and 7.72 kDa, respectively). (B)  
630 Immunoblot analysis for PilA. The PageRuler Pre-stained Protein Ladder standard  
631 (ThermoScientific) was used as a molecular weight.

632

633 **FIG 3.** Palladium reduction by different strains of *G. sulfurreducens*. (A) Kinetics of Pd(II)  
634 reduction. Photograph of bottles applied for Pd(II) reduction is shown in the inset. (B)  
635 Comparison of XRD patterns corresponding to cells and black precipitates obtained from  
636 cultures of WT,  $\Delta pilA$  and  $\Delta pilR$  strains under Pd(II)-reducing conditions. In (A) and (B),  
637 WT strain line blue,  $\Delta pilA$  strain line black,  $\Delta pilR$  strain line orange.

638

639 **FIG 4.** Growth of *Geobacter sulfurreducens* coupled to Pd(II) reduction. (A) Growth. (B)  
 640 Pd(II) reduction. (C) Consumption of pyruvate. In A, B and C, line with squares, pyruvate-  
 641 Pd(II) supplemented with glutamine; line with rhombi, pyruvate-Pd(II).

642

643 **FIG 5.** Model of Pd(II) reduction by *Geobacter sulfurreducens*.

644

645

646

647

648 **TABLE 1** Bacterial strain and primer sequences used in this work and for RT-qPCR

649 validations

| Strain                          | Description                             | Reference/source |
|---------------------------------|-----------------------------------------|------------------|
| <i>Geobacter sulfurreducens</i> |                                         |                  |
| PCA strain                      | Wild type                               | 4                |
| $\Delta pilR$ strain            | <i>pilR::kan</i> , kanamycin resistance | 23               |
| $\Delta pilA$ strain            | <i>pilA::kan</i> , kanamycin resistance | 12               |
| Oligonucleotides                | Sequence 5' → 3'                        |                  |
| qPCRrecCfw                      | CTGTCGTCACCCTTTGTTCC                    | This study       |
| qPCRrecCrev                     | GAAAGGGATAGGAGCCGTC                     | This study       |
| qPCRomcMfw                      | TGGAGACTACCCATGCTGAA                    | This study       |
| qPCRomcMrev                     | AGACGTCGAGGTGCTCGTAT                    | This study       |
| qPCRomcHfw                      | ATGGACGTGAATGGAAGGAG                    | This study       |
| qPCRomcHrev                     | TGGCAGTCAGTACAGGTGGA                    | This study       |

|                |                       |            |
|----------------|-----------------------|------------|
| qPCRppcDfw     | CAGCACTCACCTGTTCTGT   | This study |
| qPCRppcDrev    | TGCTTTTTGTGGTCGAAGGT  | This study |
| qPCRhgtRfw     | GAGAGAAAATCCGCGGTACA  | This study |
| qPCRhgtRrev    | TAGCCTCCCTCATGATGTCC  | This study |
| qPCRGSU1062fw  | TCCAGGATTCCGAAACTCAA  | This study |
| qPCRGSU1062rev | CGGCTCTATTTGCTCTCAG   | This study |
| qPCRGSU0207fw  | AGCAAGGGCTTTGGTTTTCT  | This study |
| qPCRGSU0207rev | TTACCCTATCGCCTTCAGCA  | This study |
| qPCRGSU1650fw  | TACCCCGTGTTTCGCTATCT  | This study |
| qPCRGSU1650rev | CCGTGGAAATCGAAGAATTT  | This study |
| qPCRGSU0837fw  | GCATTGAACGGATCTTCGAC  | This study |
| qPCRGSU0837rev | GCGGACGTACTGTTCATGTC  | This study |
| qPCRGSU0345fw  | CGAGTCACTCTCGTTGCAGA  | This study |
| qPCRGSU0345rev | TGCGAGAGAGCAGATGAAGA  | This study |
| qPCRGSU2813fw  | CGGTTCTCAACTCGGTCTTC  | This study |
| qPCRGSU2813rev | GACATAGTCGGGGATGCTGT  | This study |
| qPCRGSU0615fw  | ACTTTGCCCTCTGTTTCACG  | This study |
| qPCRGSU0615rev | GAATCCGCTCTTTGACAAGC  | This study |
| qPCRGSU2937fw  | GTCACCAGGAAGTCCACGAT  | This study |
| qPCRGSU2937rev | TCAGGTGCTCAACTTTCACG  | This study |
| qPCRGSU1106fw  | AGTTCCCCAGTACGTGTTTCG | This study |
| qPCRGSU1106rev | GCGAACTTGGAATCCTTTTG  | This study |
| qPCRomcBfw     | GGAGTATGTGGCATCCCTTG  | This study |

|                            |                       |            |
|----------------------------|-----------------------|------------|
| qPCR <sub>omc</sub> Brev   | ACCGTTGGCATTTCGTATCTC | This study |
| qPCR <sub>omc</sub> Cfw    | AGAGTACGTGGCATCCCTTG  | This study |
| qPCR <sub>omc</sub> Crev   | CCGTTGGCATTTCGTATCTCT | This study |
| qPCR <sub>omc</sub> Sfw    | TCCTACCAGAACAGCAACGA  | This study |
| qPCR <sub>omc</sub> Srev   | ATAGGAACCGCTCAGGGACT  | This study |
| qPCR <sub>omc</sub> Zfw    | AAGCCGACTGTCTCGAGTGT  | This study |
| qPCR <sub>omc</sub> Zrev   | CGGAGGTATTGATGCAGCTT  | This study |
| qPCR <sub>omc</sub> Efw    | CCAGATCTGCGTGTCTGTC   | This study |
| qPCR <sub>omc</sub> Erev   | CATGCTGCTGGACGAGTAGA  | This study |
| qPCR <sub>ppc</sub> Bfw    | CCACAAGAAACACCAGACGA  | This study |
| qPCR <sub>ppc</sub> Brev   | CACCCCTTGCAGGACTTG    | This study |
| qPCR <sub>pilA</sub> Fw    | AATTACCCCCATACCCCAAC  | This study |
| qPCR <sub>pilA</sub> Rev   | AGCAGCTCGATAAGGGTGAA  | This study |
| qPCR <sub>GSU2513</sub> Fw | GACCAGGCCAGTTCAAGTA   | This study |
| qPCR <sub>GSU2513</sub> Rv | GGTGTCGATTTCAATTTCTG  | This study |
| qPCR <sub>GSU2808</sub> Fw | CGAAATGCCATACCTCCACT  | This study |
| qPCR <sub>GSU2808</sub> Rv | TATATTGCCCCGAGTTGTCC  | This study |
| qPCR <sub>GSU0592</sub> Fw | GGAGTATTCCCCCTGAAGGA  | This study |
| qPCR <sub>GSU0592</sub> Rv | ATGTTTCTGGTGGCTGAAGG  | This study |
| qPCR <sub>GSU2495</sub> Fw | ACCAGCTCTGCTTCGACTGT  | This study |
| qPCR <sub>GSU2495</sub> Rv | GGTTGTGGCAGAGGGTACAT  | This study |

650

651

652

653

654

655

656

657

658



659 **TABLE 2.** *c*-type cytochrome and putative cytochrome genes that were differentially expressed in palladium reduction

**Cytochromes genes that were upregulated in RNA-Seq experiments**

| Locus ID | Gene annotation                                    | Gene                    | Fold   | log2 FC | P-value | Signal  | Cellular location |
|----------|----------------------------------------------------|-------------------------|--------|---------|---------|---------|-------------------|
|          |                                                    | name                    | change |         |         | peptide |                   |
| GSU0612  | Cytochromec3, 3 heme-binding sites                 | <i>ppcA</i>             | 0.381  | 1.390   | 1.4E-06 | Yes     | Periplasmic       |
| GSU1024  | Cytochromec3, 3 heme-binding sites                 | <i>ppcD</i>             | 0.440  | 1.186   | 2.4E-03 | Yes     | Periplasmic       |
| GSU1062  | Cytochrome c putative, 1 heme-binding site         | -                       | 0.281  | 1.830   | 4.1E-05 | Yes     | Periplasmic       |
| GSU2513  | Cytochrome c family protein, 1 heme-binding site   | -                       | 0.423  | 1.243   | 2.4E-02 | Yes     | Unknown           |
| GSU2808  | Cytochrome c family protein, 5 heme-binding sites  | -                       | 0.338  | 1.563   | 3.0E-05 | Yes     | Outer membrane    |
| GSU2934  | Cytochrome c family protein, 9 heme-binding sites  | <i>cbcN</i>             | 0.476  | 1.071   | 2.6E-04 | Yes     | Periplasmic       |
| GSU3107  | Ribosomal protein L31, 1 heme-binding site         | <i>rpmE</i>             | 0.404  | 1.307   | 5.5E-03 | NO      | Cytoplasmic       |
| GSU2883  | Cytochrome c family protein, 18 heme-binding sites | <i>omcH<sup>a</sup></i> | 0.789  | 0.342   | 1.0E+00 | Yes     | Outer membrane    |
| GSU2294  | Cytochrome c family protein, 4 heme-binding sites  | <i>omcM<sup>a</sup></i> | 0.530  | 0.917   | 5.8E-02 | Yes     | Outer membrane    |

**Cytochromes genes that were downregulated in RNA-Seq experiments**

| <b>Locus ID</b> | <b>Gene annotation</b>                                          | <b>Gene name</b>         | <b>Fold change</b> | <b>log2 FC</b> | <b>P-value</b> | <b>Signal peptide</b> | <b>Cellular location</b> |
|-----------------|-----------------------------------------------------------------|--------------------------|--------------------|----------------|----------------|-----------------------|--------------------------|
| GSU0283         | Sensor histidine kinase, 1 heme-binding site                    | -                        | 2.442              | -1.288         | 7.9E-05        | NO                    | Cytoplasmic membrane     |
| GSU0592         | Cytochrome c family protein, 11 heme-binding sites              | <i>omcQ</i>              | 2.491              | -1.317         | 1.6E-05        | Yes                   | Outer membrane           |
| GSU0615         | Cytochrome c family protein, 5 heme-binding sites               | -                        | 4.283              | -2.099         | 1.9E-03        | Yes                   | Periplasmic              |
| GSU2076         | Cytochrome c family protein, 5 heme-binding sites               | <i>omcZ</i>              | 2.181              | -1.125         | 4.8E-06        | Yes                   | Outer membrane           |
| GSU2495         | Cytochrome c family protein, 22 heme-binding sites              | -                        | 3.333              | -1.737         | 2.5E-03        | NO                    | Unknown                  |
| GSU2731         | Polyheme membrane-associated cytochrome c, 8 heme-binding sites | <i>omcC</i>              | 2.125              | -1.088         | 2.3E-03        | Yes                   | Outer membrane           |
| GSU2737         | Polyheme membrane-associated cytochrome c, 8 heme-binding sites | <i>omcB</i>              | 4.047              | -2.017         | 4.6E-02        | Yes                   | Outer membrane           |
| GSU2811         | Cytochrome c Hsc, 1 heme-binding site                           | <i>cccA</i>              | 2.657              | -1.410         | 6.8E-16        | Yes                   | Periplasmic              |
| GSU2813         | Cytochrome c551 peroxidase, 2 heme-binding sites                | <i>ccpA</i>              | 3.285              | -1.716         | 4.5E-13        | Yes                   | Periplasmic              |
| GSU2937         | Cytochrome c family protein, 5 heme-binding sites               | -                        | 3.523              | -1.817         | 9.9E-03        | Yes                   | Periplasmic              |
| GSU2504         | Cytochrome c family protein, 1 heme-binding site                | <i>omcS</i> <sup>a</sup> | 1.829              | -0.871         | 1.0E+00        | Yes                   | Outer membrane           |

660 Protein cellular location was predicted with PSORT-B (49) and SignalP 3.0 Server (50).

661 <sup>a</sup> values are out of cut off for Fold change but validated by RT-qPCR

662

663 **TABLE 3.** Genes encoding transcriptional regulators differentially expressed in during palladium reduction**Genes encoding proteins involved in transcriptional regulation that were upregulated in RNA-Seq experiments**

| <b>Locus ID</b> | <b>Gene annotation</b>                                               | <b>Gene name</b> | <b>Fold change</b> | <b>log FC</b> | <b>P-value</b> |
|-----------------|----------------------------------------------------------------------|------------------|--------------------|---------------|----------------|
| GSU0284         | TraR/DksA family, zinc finger transcriptional regulator              | <i>dksA</i>      | 0.324              | 1.63          | 5.7E-05        |
| GSU0298         | Two-component system                                                 | <i>fgrM-N</i>    | 0.347              | 1.53          | 8.0E-23        |
| GSU0475         | Sensor histidine kinase, PAS domain-containing                       | -                | 0.401              | 1.32          | 1.4E-02        |
| GSU0596         | Response receiver                                                    | -                | 0.304              | 1.72          | 2.1E-11        |
| GSU0849         | Regulator of cell morphogenesis and NO signaling                     | <i>scdA</i>      | 0.328              | 1.61          | 2.8E-03        |
| GSU0863         | Regulatory protein                                                   | -                | 0.292              | 1.78          | 2.7E-03        |
| GSU0877         | Response regulator, PilZ domain-containing                           | -                | 0.203              | 2.30          | 7.4E-04        |
| GSU0941         | Nitrogen fixation transcript antitermination sensor histidine kinase | <i>gnfK</i>      | 0.134              | 2.90          | 6.1E-08        |
| GSU0962         | Two-component system, NtrC family, sensor kinase                     | -                | 0.186              | 2.42          | 1.5E-04        |
| GSU1038         | Response receiver histidine kinase                                   | -                | 0.338              | 1.57          | 6.2E-03        |
| GSU1072         | IclR family, transcriptional regulator                               | -                | 0.070              | 3.83          | 2.3E-08        |
| GSU1117         | Response regulator                                                   | -                | 0.243              | 2.04          | 3.5E-04        |

|         |                                                           |               |       |      |         |
|---------|-----------------------------------------------------------|---------------|-------|------|---------|
| GSU1345 | BadM/Rrf2 family, transcriptional regulator               | -             | 0.203 | 2.30 | 2.5E-03 |
| GSU1379 | Transcriptional regulator, ferric uptake regulator        | <i>fur</i>    | 0.275 | 1.86 | 1.0E-07 |
| GSU1419 | Cro/CI family, transcriptional regulator                  | -             | 0.278 | 1.85 | 5.3E-04 |
| GSU1521 | Integration host factor, alpha subunit                    | <i>ihfA-1</i> | 0.250 | 2.00 | 2.8E-14 |
| GSU1639 | BadM/Rrf2 family, transcriptional regulator               | -             | 0.082 | 3.61 | 1.6E-16 |
| GSU1658 | Response regulator receiver modulated diguanylate cyclase | -             | 0.263 | 1.93 | 1.9E-07 |
| GSU1836 | Nitrogen regulatory protein P-II                          | <i>glnB</i>   | 0.094 | 3.41 | 1.0E-16 |
| GSU1999 | RNA-binding protein Hfq                                   | <i>hfq</i>    | 0.481 | 1.06 | 2.5E-03 |
| GSU2016 | Sensor diguanylate cyclase/phosphodiesterase              | -             | 0.428 | 1.23 | 5.7E-03 |
| GSU2046 | Response regulator                                        | -             | 0.436 | 1.20 | 5.0E-05 |
| GSU2287 | response regulator                                        | -             | 0.358 | 1.48 | 4.6E-05 |
| GSU2288 | Sensor histidine kinase                                   | -             | 0.298 | 1.75 | 1.4E-03 |
| GSU2384 | sensor histidine kinase, GAF domain-containing            | -             | 0.275 | 1.86 | 2.3E-03 |
| GSU2625 | ArsR family, transcriptional regulator                    | -             | 0.194 | 2.36 | 2.0E-03 |
| GSU2641 | PATAN domain GTPase-activating protein                    | -             | 0.138 | 2.86 | 1.4E-33 |
| GSU2666 | TetR family, transcriptional regulator                    | -             | 0.443 | 1.17 | 1.3E-05 |

|         |                                                                    |             |       |      |         |
|---------|--------------------------------------------------------------------|-------------|-------|------|---------|
| GSU2735 | TetR family, transcriptional regulator                             | -           | 0.268 | 1.90 | 1.8E-03 |
| GSU2741 | TetR family, transcriptional regulator                             | -           | 0.200 | 2.32 | 1.8E-02 |
| GSU2809 | Fur family, transcriptional regulator                              | -           | 0.333 | 1.59 | 1.3E-05 |
| GSU2822 | Response regulator receiver and ANTAR domain protein               | <i>gnfR</i> | 0.055 | 4.19 | 4.5E-06 |
| GSU2980 | CopG family transcriptional regulator, nickel-responsive regulator | <i>nikR</i> | 0.117 | 3.09 | 2.9E-04 |
| GSU3127 | AraC family, transcriptional regulator                             | -           | 0.441 | 1.18 | 5.0E-02 |
| GSU3206 | TraR/DksA family, zinc finger transcriptional regulator            | -           | 0.147 | 2.77 | 9.0E-07 |
| GSU3261 | Response regulator                                                 | -           | 0.439 | 1.19 | 2.9E-04 |
| GSU3292 | Fur family, transcriptional regulator                              | -           | 0.438 | 1.19 | 1.9E-07 |
| GSU3298 | Cro/CI family, transcriptional regulator                           | -           | 0.208 | 2.26 | 8.4E-04 |
| GSU3364 | Transcriptional regulator                                          | <i>hgtR</i> | 0.021 | 5.54 | 3.6E-16 |
| GSU2185 | FlgM family, anti-sigma-28 factor                                  | -           | 0.135 | 2.89 | 9.9E-07 |

**Genes encoding proteins involved in transcriptional regulation that were downregulated in RNAseq experiments**

| <b>Locus ID</b> | <b>Gene annotation</b>                                                    | <b>Gene name</b> | <b>Fold change</b> | <b>log FC</b> | <b>P-value</b> |
|-----------------|---------------------------------------------------------------------------|------------------|--------------------|---------------|----------------|
| GSU0013         | MarR family, transcriptional regulator                                    | -                | 3.228              | -1.69         | 5.9E-08        |
| GSU0452         | Sensor histidine kinase                                                   | -                | 2.315              | -1.21         | 4.5E-04        |
| GSU0534         | BadM/Rrf2 family, transcriptional regulator                               | <i>iscR-1</i>    | 2.065              | -1.05         | 5.8E-12        |
| GSU0537         | Sensor diguanylate cyclase/phosphodiesterase, PAS domain-containing       | -                | 2.134              | -1.09         | 1.1E-03        |
| GSU0811         | Fis family, transcriptional regulator                                     | -                | 3.363              | -1.75         | 4.1E-02        |
| GSU0836         | RNA polymerase-binding protein Rnk                                        | <i>rnk-2</i>     | 91.515             | -6.52         | 4.2E-28        |
| GSU0837         | Response regulator                                                        | -                | 99.620             | -6.64         | 2.0E-30        |
| GSU0841         | NtrC family, response regulator                                           | -                | 39.998             | -5.32         | 4.3E-04        |
| GSU0842         | Sensor histidine kinase response regulator, GAF and PAS domain-containing | -                | 15.129             | -3.92         | 3.6E-46        |
| GSU1119         | Response receiver histidine kinase                                        | -                | 2.417              | -1.27         | 4.7E-03        |
| GSU1671         | Response receiver-modulated diguanylate cyclase                           | -                | 2.223              | -1.15         | 5.6E-04        |
| GSU2602         | Integration host factor, subunit beta                                     | <i>ihfB-2</i>    | 3.979              | -1.99         | 1.1E-02        |
| GSU2815         | Sensor histidine kinase, PAS domain-containing                            | -                | 2.419              | -1.27         | 3.3E-02        |

664 **TABLE 4.** Expression of genes with relevant phenotype observed in RNA-Seq analysis

665 validated by RT-qPCR

| <b>Locus ID</b> | <b>Common name</b>                                        | <b>Avg +Pd/Avg -Pd</b> |
|-----------------|-----------------------------------------------------------|------------------------|
| GSU2294         | OmcH, cytochrome c                                        | 2.87                   |
| GSU2883         | OmcM, cytochrome c                                        | 1.29                   |
| GSU1024         | PpcD, cytochrome c                                        | 5.80                   |
| GSU1062         | Cytochrome c, 1 heme-binding site                         | 5.63                   |
| GSU0207         | Cold shock DNA/RNA-binding protein                        | 12.91                  |
| GSU1650         | Cytochrome b/b6 complex                                   | 2.14                   |
| GSU3364         | HgtR, hydrogen-dependent growth transcriptional regulator | 9.42                   |
| GSU1945         | PilA, pilin protein                                       | 1.50                   |
| GSU2513         | Cytochrome c, 1 heme-binding site                         | 1.91                   |
| GSU2808         | Cytochrome c, 5 heme-binding site                         | 9.44                   |
| GSU2737         | OmcB, lipoprotein cytochrome c                            | 0.28                   |
| GSU3731         | OmcC, lipoprotein cytochrome c                            | 0.33                   |
| GSU2076         | OmcZ, cytochrome c                                        | 0.28                   |
| GSU0618         | OmcE, cytochrome c                                        | 0.88                   |
| GSU2504         | OmcS, cytochrome c                                        | 0.56                   |
| GSU0364         | PpcB, cytochrome c                                        | 0.98                   |
| GSU0592         | OmcQ, cytochrome c                                        | 0.40                   |
| GSU2495         | Cytochrome c, 22 heme-binding site                        | 0.20                   |
| GSU0837         | Response regulator                                        | 0.04                   |
| GSU0345         | nuoH-1, NADH dehydrogenase I                              | 0.74                   |

|         |                                   |      |
|---------|-----------------------------------|------|
| GSU2813 | CcpA, cytochrome c peroxidase     | 0.35 |
| GSU0615 | Cytochrome c, 5 heme-binding site | 0.28 |
| GSU2937 | Cytochrome c, 5 heme-binding site | 0.49 |
| GSU1106 | GltA, type I citrate synthase     | 0.48 |

666

667 n-fold change were calculated based on the  $2^{-DDCT}$  method (21). Avg= Average; -Pd=

668 without palladium and +Pd= with palladium.

669

670

671

672



## FIGURES

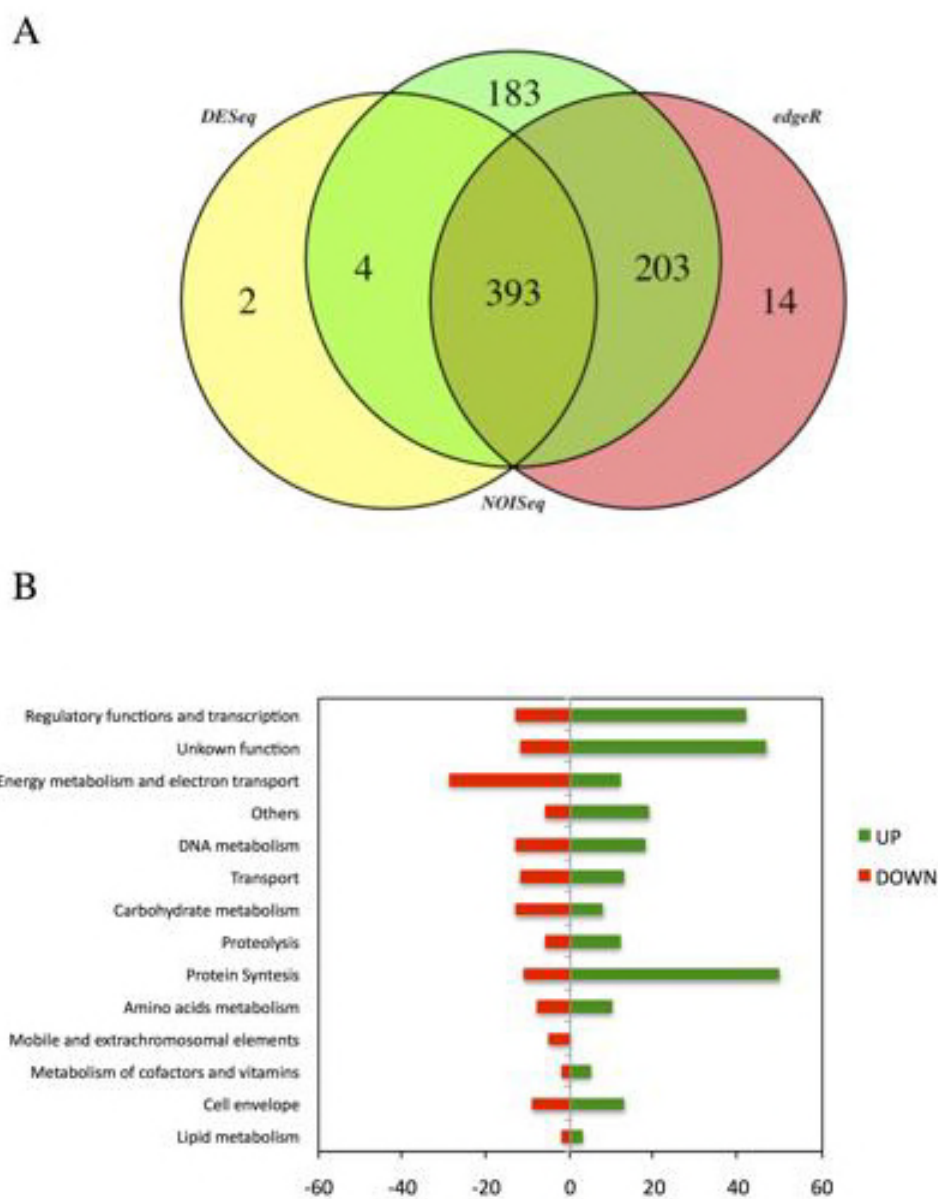

**FIG 1.** Transcriptome analysis results from *Geobacter sulfurreducens* under Pd(II)-reducing conditions. (A) Venn diagram representing differential gene expression analysis from Pd(II)-reducing conditions by three statistical methods. (B) Functional overview of the genes that were differentially expressed during Palladium reduction.

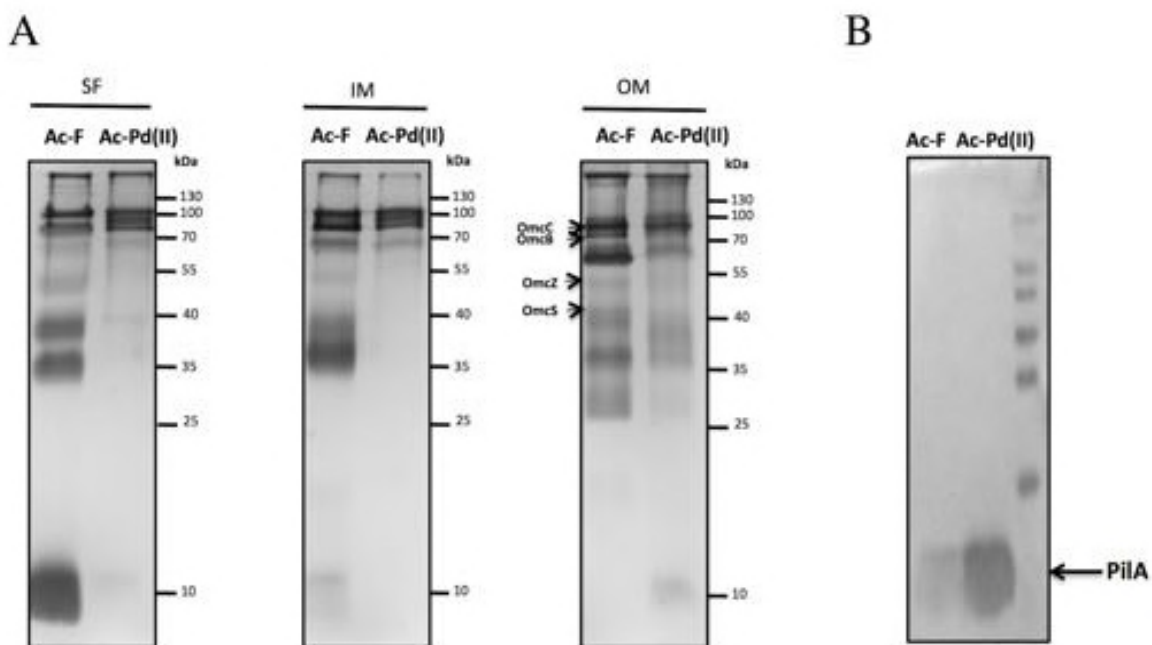

**FIG 2.** *c*-type cytochrome and PilA protein content found under Pd(II)-reducing conditions. (A) SDS-PAGE heme stained. Outer membrane (OM), inner membrane (IM) and soluble fraction (SF) were prepared from PCA strain with acetate-fumarate (Ac-F) or acetate-Pd(II) (Ac-Pd(II)). The localization of OmcC, OmcB, OmcS, OmcZ and PpcA were labeled based on expected molecular weight (78.96, 74.89, 42.94, 47.09 and 7.72 kDa, respectively). (B) Immunoblot analysis for PilA. The PageRuler Pre-stained Protein Ladder standard (ThermoScientific) was used as a molecular weight.

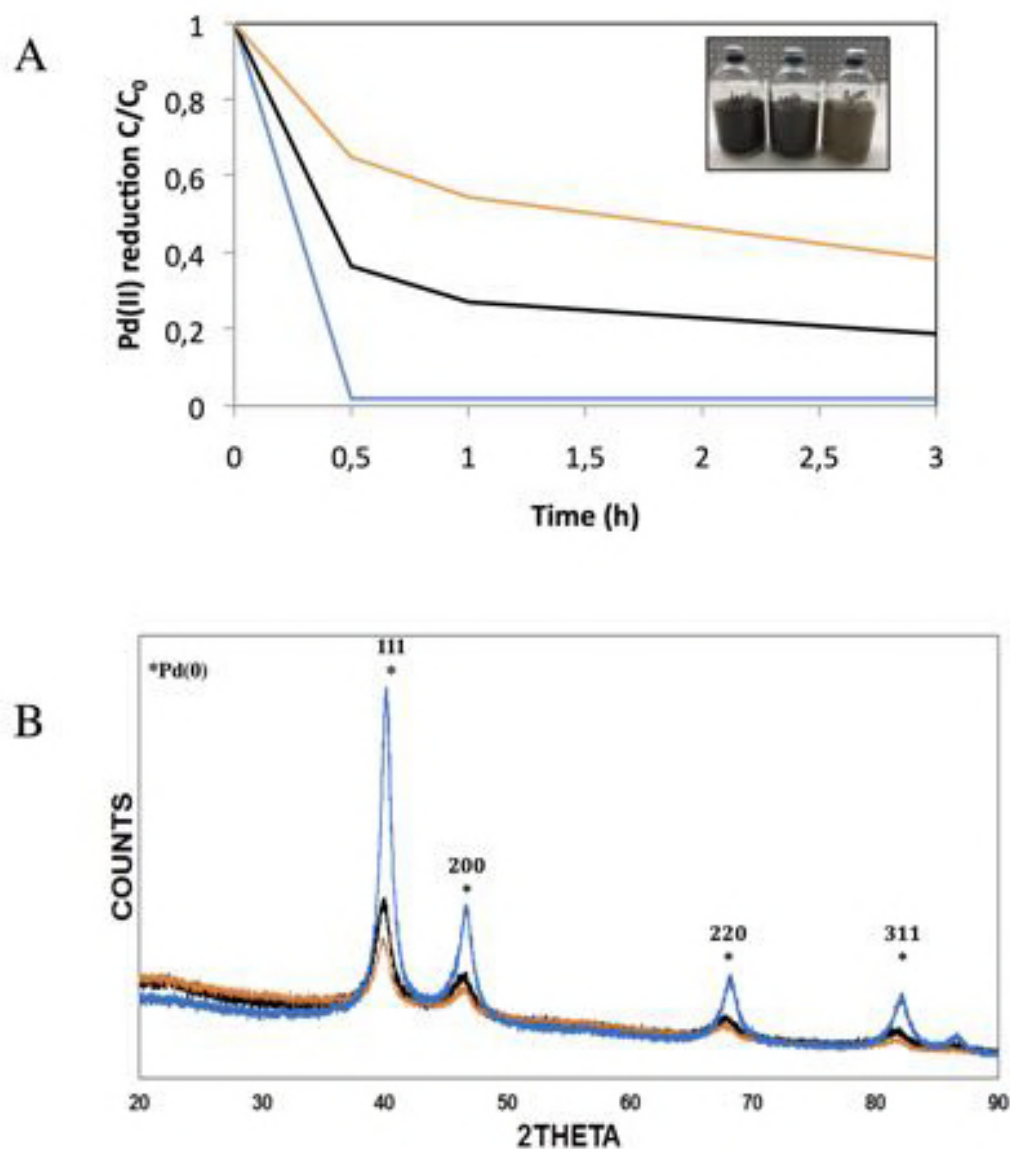

**FIG 3.** Palladium reduction by different strains of *G. sulfurreducens*. (A) Kinetics of Pd(II) reduction. Photograph of bottles applied for Pd(II) reduction is shown in the inset. (B) Comparison of XRD patterns corresponding to cells and black precipitates obtained from cultures of WT,  $\Delta pilA$  and  $\Delta pilR$  strains under Pd(II)-reducing conditions. In (A) and (B), WT strain line blue,  $\Delta pilA$  strain line black,  $\Delta pilR$  strain line orange.

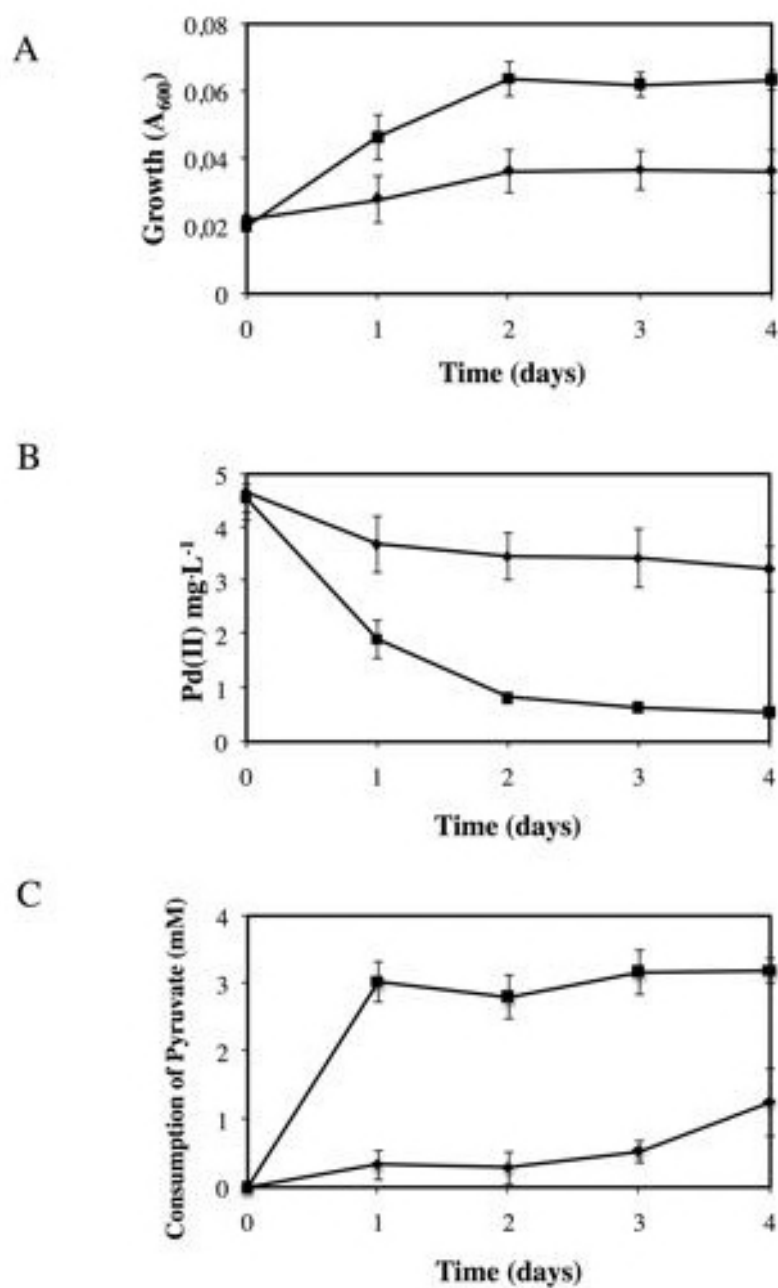

**FIG 4.** Growth of *Geobacter sulfurreducens* coupled to Pd(II) reduction. (A) Growth. (B) Pd(II) reduction. (C) Consumption of pyruvate. In A, B and C, line with squares, pyruvate-Pd(II) supplemented with glutamine; line with rhombi, pyruvate-Pd(II).

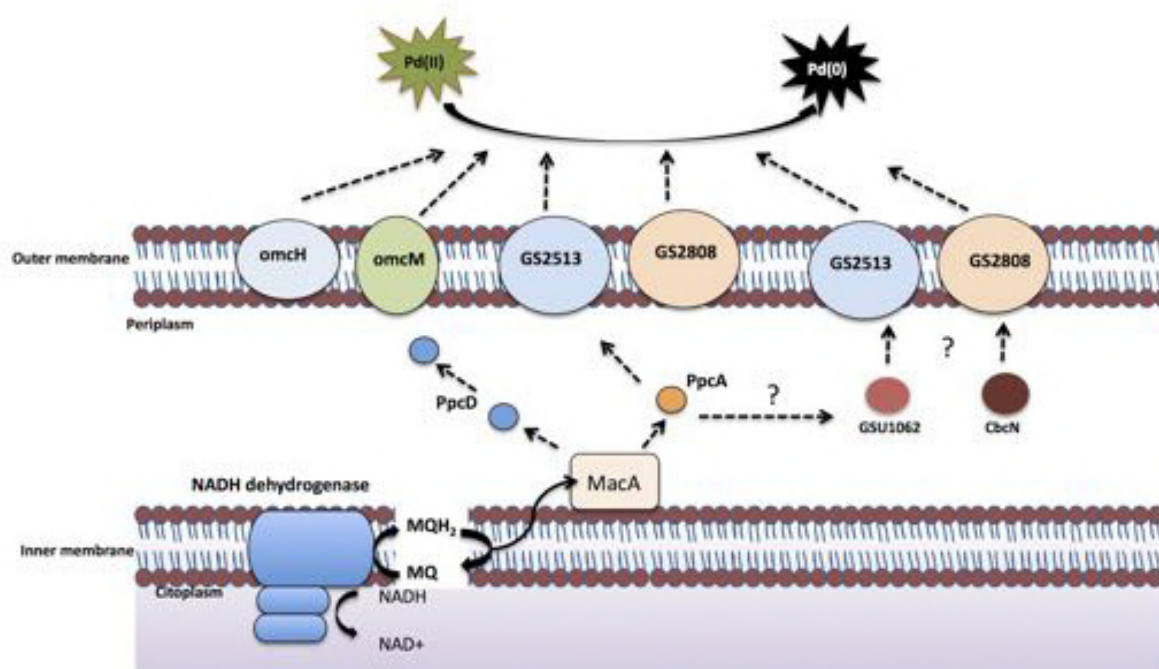

**FIG 5.** Model of Pd(II) reduction by *Geobacter sulfurreducens*.
